# 1 The second lineage differentiation of bovine embryos fails in the 2 absence of OCT4/POU5F1

3 Kilian Simmet <sup>1,2</sup>, Mayuko Kurome <sup>1,2</sup>, Valeri Zakhartchenko <sup>1,2</sup>, Horst-Dieter Reichenbach <sup>4</sup>, Claudia  
4 Springer <sup>1,2</sup>, Andrea Bähr <sup>\*\*1,2</sup>, Helmut Blum <sup>3</sup>, Julia Philippou-Massier <sup>3</sup> and Eckhard Wolf <sup>\*1,2,3</sup>

5 1 Institute of Molecular Animal Breeding and Biotechnology, Gene Center and Department of  
6 Veterinary Sciences, LMU Munich, Munich,

7 2 Center for Innovative Medical Models (CiMM), LMU Munich, Munich, Germany

8 3 Laboratory for Functional Genome Analysis (LAFUGA), Gene Center, LMU Munich, Munich,  
9 Germany

10 4 Bavarian State Research Center for Agriculture, Institute of Animal Breeding, Poing, Germany

11 \* Correspondence: [k.simmet@gen.vetmed.uni-muenchen.de](mailto:k.simmet@gen.vetmed.uni-muenchen.de)

12 \*\* Current affiliation: Internal Medicine I , Klinikum rechts der Isar, TU Munich, Munich,  
13 Germany

## 14 ABSTRACT

15 The mammalian blastocyst undergoes two lineage segregations, i.e., formation of the trophectoderm  
16 and subsequently differentiation of the hypoblast (HB) from the inner cell mass, leaving the epiblast  
17 (EPI) the remaining pluripotent lineage. To clarify expression patterns of markers specific for these  
18 lineages in bovine embryos, we analyzed day 7, 9 and 12 blastocysts completely derived *ex vivo* by  
19 staining for OCT4, NANOG, SOX2 (EPI) and GATA6, SOX17 (HB) and identified genes specific for these  
20 developmental stages in a global transcriptomics approach. To study the role of OCT4, we generated  
21 OCT4-deficient (*OCT4* KO) embryos via somatic cell nuclear transfer or *in vitro* fertilization. *OCT4* KO  
22 embryos reached the expanded blastocyst stage by day 8 but lost of NANOG and SOX17 expression,  
23 while SOX2 and GATA6 were unaffected. Blastocysts transferred to recipient cows from day 6 to 9  
24 expanded, but the *OCT4* KO phenotype was not rescued by the uterine environment. Exposure of *OCT4*  
25 KO embryos to exogenous FGF4 or chimeric complementation with *OCT4* intact embryos did not  
26 restore NANOG or SOX17 in *OCT4*-deficient cells. Our data show, that OCT4 is required cell-  
27 autonomously for the maintenance of pluripotency of the EPI and differentiation of the HB in bovine  
28 embryos.

## 29 INTRODUCTION

30 During preimplantation development, the mammalian embryo undergoes two consecutive lineage  
31 differentiations resulting in a blastocyst with three distinct lineages. The trophectoderm (TE)  
32 represents the first differentiated epithelium and envelopes the inner cell mass (ICM), which retains a  
33 pluripotent state. Subsequently, within the ICM the primitive endoderm (PE), or hypoblast (HB) in  
34 human and bovine, segregates from the epiblast (EPI), which contains the last pluripotent cells and  
35 gives rise to the embryo proper. The TE will contribute the embryonic portion of the placenta and the  
36 PE/HB develops into the yolk sac [1, 2]. The fundamental mechanisms regulating these events have  
37 been studied extensively in the mouse, while advances in genome editing have enabled researchers to  
38 study the specific function of genes during preimplantation development in alternative model  
39 organisms. Given the substantial differences in regulation of lineage differentiation and maintenance  
40 of pluripotency between mouse and other mammalian species, this progress harbors the prospect of  
41 a deeper understanding of preimplantation development, also in human. Because *in vitro* embryo  
42 production techniques are highly advanced in bovine, this species offers great opportunities as a model  
43 for preimplantation development [3-5].

44 The second lineage differentiation, when the PE/HB and EPI segregate, is regulated by EPI precursor  
45 cells expressing FGF4, which via the MEK-pathway induces the differentiation of PE/HB precursor cells.  
46 Preimplantation embryos cultured with exogenous FGF4 develop an ICM entirely made up of PE/HB  
47 cells [4]. The transcription factor OCT4/POU5F1 plays a pivotal role in mammalian embryo  
48 development, as it regulates both the maintenance of pluripotency as well as differentiation events  
49 [6]. In mouse, loss of OCT4 prevents development of the primitive endoderm during the second lineage  
50 differentiation, while initial expression of the epiblast marker NANOG is not affected [7, 8]. On the  
51 contrary, expression of NANOG fails in OCT4-deficient bovine blastocysts, while the early presumptive  
52 hypoblast marker GATA6 is still present. Yet, it remains unclear if OCT4 has a role in the second lineage  
53 differentiation in bovine embryos, as GATA6 does not exclusively mark cells committed to the  
54 hypoblast, but also cells in the TE [9, 10].

55 Because data on the second lineage differentiation in bovine embryos is scarce, we first investigated  
56 expression patterns of lineage marker proteins and transcriptome dynamics of day 7, 9, and 12  
57 embryos produced completely *in vivo* (thus representing *bona fide* samples of early bovine  
58 development). Studies of *OCT4* knockout (KO) blastocysts generated by somatic cell nuclear transfer  
59 (SCNT) and zygote injection (ZI) showed, that both EPI maintenance as well as HB differentiation is  
60 dependent on OCT4. Neither chimeric complementation with OCT4-intact blastomeres nor  
61 supplementation of exogenous FGF4 could rescue the *OCT4* KO phenotype. Therefore, we conclude  
62 that – as in mouse – OCT4 is required cell-autonomously during differentiation of the HB in bovine  
63 blastocysts.

## 64 RESULTS

### 65 ***Lineage marker and transcriptome dynamics during the second lineage differentiation in ex vivo*** 66 ***embryos***

67 To investigate the expression patterns of lineage markers of EPI (OCT4, NANOG, SOX2) and HB (SOX17,  
68 GATA6), we stained embryos flushed from the uterus after superstimulation as *bona fide* samples at  
69 days 7, 9 and 12 from n=7 (day 7 and 9) and n=3 (day 12) different donor cows. At day 7, OCT4 was  
70 expressed in TE and pan-ICM, and by day 9, OCT4 was restricted to EPI-cells and the percentage of  
71 OCT4 cells strongly decreased. At all examined stages, NANOG was only present in EPI cells and their  
72 precursors, i.e. co-expressed with OCT4 and SOX2 but mutually exclusive with GATA6 and SOX17. SOX2  
73 was expressed pan-ICM at day 7 and restricted to EPI by day 9, resulting in a decreased percentage of  
74 SOX2 positive cells. Together with NANOG, SOX2 cells were still present in the embryonic disc at day

75 12 and it has been shown previously, that OCT4 is present in this lineage until day 17 [11, 12]. SOX17  
 76 was not present in 8/28 day 7 embryos and only faint and restricted to the ICM in the remainder. By  
 77 day 9, the hypoblast began to form an inner lining of the blastocoel cavity consisting of the visceral  
 78 and parietal hypoblast [13, 14], which were both marked by SOX17 until day 12. GATA6 was expressed  
 79 at day 7 and 9 in the TE and ICM, but not co-expressed with NANOG. At day 12, there was no GATA6  
 80 visible in any of the lineages (Figure 1).

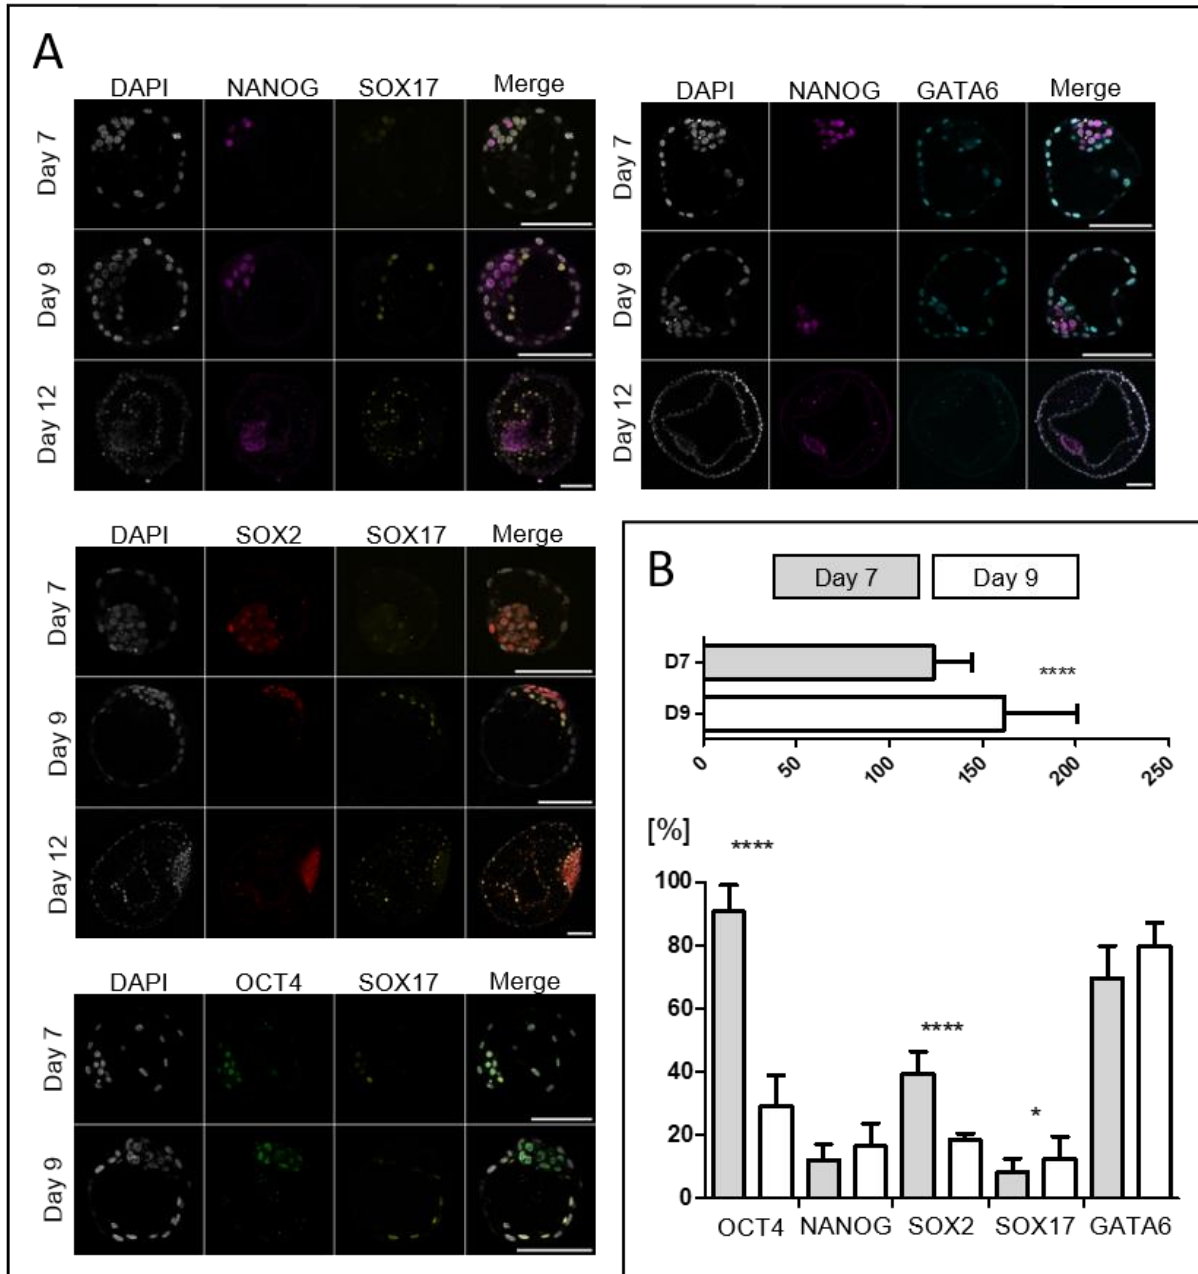

81

82 *Figure 1: The second lineage differentiation in ex vivo embryos. A) Representative confocal planes of Day 7, 9,*  
 83 *and 12 embryos stained for NANOG/SOX17 (n=10, 5 and 5), NANOG/GATA6 (n=10, 6 and 3), SOX2/SOX17 (n=8,*  
 84 *6 and 4) and OCT4/SOX17 (n=10 and 5). All scale bars represent 100  $\mu$ m. B) Total cell numbers and proportion*  
 85 *of cells stained positive for lineage specific markers at day 7 (D7) and day 9 (D9) relative to the total cell*  
 86 *number. Data is presented as mean  $\pm$  standard deviation, asterisks indicate significant differences between D7*  
 87 *and D9 (two tailed t-test, \*P < 0.05; \*\*\*\*P < 0.0001). Number of examined embryos: Total cell number (D7:*  
 88 *n=44; D9: n=21), OCT4 (D7: n=10; D9: n=5), NANOG (D7: n=17; D9: n=11), SOX2 (D7: n=15; D9: n=5), SOX17 (D7:*  
 89 *n=20; D9: n=15), GATA6 (D7: n=10; D9: n=6). Calculation of percentage of SOX17 positive cells does not include*  
 90 *embryos with no SOX17 expression (n=8).*

91 In a global transcriptomics approach, we aimed to identify genes that are specific to the developmental  
92 stages at day 7, 9 and 12 and the respective embryonic cell lineages EPI, HB and TE. From three  
93 different donor cows, we analyzed three day 7 and each four day 9 and day 12 embryos. Differential  
94 gene expression analysis using DESeq2 revealed 1890 and 2716 differentially abundant transcripts  
95 (DATs,  $p_{\text{adj.}} < 0.05$ ) in day 9 vs. day 7 and in day 12 vs. day 9 blastocysts, respectively. DATs were  
96 categorized into eight different groups according to their gene expression pattern over the course of  
97 time, i.e., steadily increasing or decreasing, peaking at day 7, 9 or 12 and showing no difference  
98 between day 7 and 9 but increase or decrease at day 12 and vice versa. Identified DATs were compared  
99 to gene sets, which have been reported to be specific for EPI, PE/HB and TE in mouse, human and  
100 bovine embryos (Figure 2, Dataset S1). Transcripts from EPI specific genes are generally more  
101 prominent at day 7 and day 9 than at day 12; consistent with the proportion of OCT4 positive cells at  
102 day 7 and 9 (Figure 1), the abundance of *OCT4* transcripts steadily decreases until day 12. *NANOG* and  
103 *SOX2* show similar abundances at day 7 and 9 but decrease by day 12. *NODAL*, a member of the  
104 pluripotency maintaining TGF $\beta$ /ACTIVIN/NODAL signaling pathway [15], increased 80-fold from day 7  
105 to day 9 and again decreased 2.8 fold by day 12. Interestingly, the NODAL antagonist *LEFTY2* [16]  
106 followed the same expression pattern, while transcripts of the NODAL activating convertase *FURIN*  
107 [13] steadily increased. The only EPI gene showing its highest abundance at day 12 was *FGFR1*, which  
108 in pre-gastrulation stage human embryos is reported to be enriched in hypoblast cells [17]. HB specific  
109 transcripts mostly increased until day 12, except *GATA6* and *HDAC1*. While the decreasing abundance  
110 of *GATA6* is consistent with the observed pattern in the immunofluorescence stainings, *SOX17* was not  
111 differentially abundant between day 7 and day 9 but increased later at day 12. *CDX2* is an early marker  
112 for TE, which is not differentially abundant between day 7 and day 9 but increases 1.5-fold until day  
113 12. Except group 2 (Figure 2), TE genes are represented in every expression pattern, indicating that  
114 this lineage undergoes dynamic changes during the observed period.

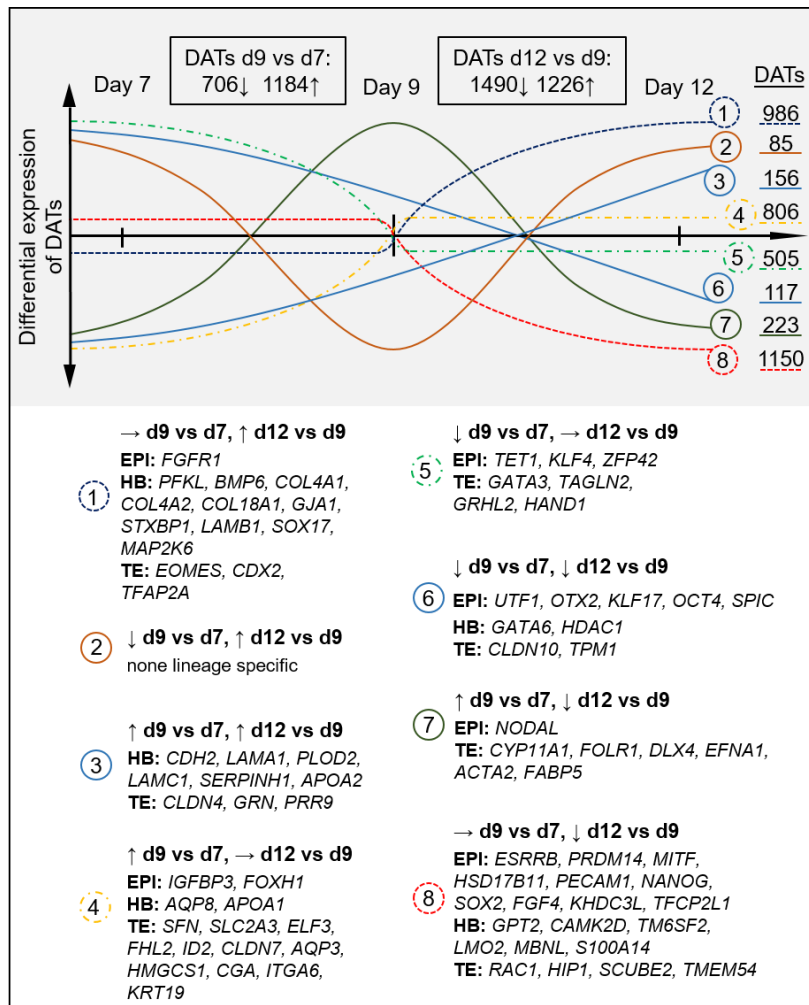

115

116 *Figure 2: Differentially abundant transcripts (DATs) of bovine ex vivo blastocysts between day 7, 9 and 12*  
 117 *categorized into gene sets specific for epiblast (EPI), hypoblast (HB) and trophectoderm (TE). N=3 day 7*  
 118 *blastocysts and each n=4 day 9 and 12 blastocysts were analyzed using DESeq2 (padj.<0.05).*

119 A previously published global transcriptomic dataset covering *in vitro* cultured day 7 embryos from *in vitro*  
 120 fertilization (IVP Ctrl) and SCNT with wildtype cells (NT Ctrl) or cells carrying an *OCT4* KO mutation  
 121 (*OCT4*KO<sup>tm1</sup>) [9] was reanalyzed using the current genome assembly *ARS-UCD1.2* [18] and compared  
 122 to the transcriptome profile of *ex vivo* day 7 embryos. By comparing the DATs of the three above  
 123 mentioned groups against *ex vivo* day 7 embryos, we identified transcripts that were differentially  
 124 abundant due to the SCNT procedure or *in vitro* culture. Five lineage specific DATs appeared in all three  
 125 groups and are therefore attributable to *in vitro* culture, causing reduced abundance of *HAND1* (TE)  
 126 and *HDAC1* (HB) while *HSD17B11* (EPI), *HMGCS1* and *SLC2A3* (TE) were upregulated. Two DATs were  
 127 specific to the SCNT procedure with increased transcription of *CLDN7* (TE) and a lower abundance of  
 128 *MAP2K6*-mRNA (HB) (Supplementary Figure S1, A). The remaining lineage specific DATs in *OCT4*KO<sup>tm1</sup>  
 129 against *ex vivo* day 7 contained six, two and three downregulated and one, five and eight upregulated  
 130 DATs from the lineages EPI, HB and TE, respectively (Supplementary Figure S1, B), showing a shift of  
 131 gene expression towards the differentiated lineages TE and HB in the absence of *OCT4*.

### 132 Induction of *OCT4* knockout without targeting a known *OCT4* pseudogene

133 Earlier studies on the function of *OCT4* in bovine embryos [9, 19] used a sgRNA-sequence, which also  
 134 targets an *OCT4* pseudogene present in intron 1 of *ETF1* [20]. Therefore, we adapted a sgRNA  
 135 (sgRNA2b) known to be highly efficient in human embryos [21] to the bovine orthologue sequence,  
 136 where it spans an exon-intron junction at the 3'-end of exon 2 and thus does not target the pseudogene

137 in *ETF1*, because the retrocopy does not contain intronic *OCT4* sequences [20]. The sgRNA2b sequence  
138 was cloned into PX459 V2.0 to knock out *OCT4* in somatic cells and single-cell clones were produced  
139 after selection with puromycin [22]. From n=31 single-cell clones, three retained the wildtype  
140 sequence while n=11 carried homozygous mutations, that were confirmed by a single nucleotide  
141 polymorphism (SNP) 179 bp downstream the sgRNA2b cutting site. The remaining single-cell clones  
142 had bi-allelic heterozygous (n=13) or mono-allelic (n=4) mutations. None of the single-cell clones  
143 showed any mutation at the *OCT4* pseudogene, showing that sgRNA2b specifically targets *OCT4*. From  
144 the same transfection experiment, two single-cell clones with the same homozygous deletion of two  
145 basepairs (*OCT4*<sup>2bKOX1</sup> and *OCT4*<sup>2bKOX4</sup>) and one where no mutation had occurred (NT Ctrl<sup>2b</sup>) were used  
146 to reconstruct embryos via SCNT. Embryos from *OCT4*<sup>2bKOX1</sup> developed to blastocysts by day 7, albeit at  
147 a much lower rate as NT Ctrl<sup>2b</sup> embryos, while there was no difference between *OCT4*<sup>2bKOX4</sup> and NT  
148 Ctrl<sup>2b</sup> (Table 1, A). NT Ctrl<sup>2b</sup> showed expression of *OCT4* in both TE and ICM (n=4), while blastocysts  
149 from *OCT4*<sup>2bKOX1</sup> (n=5) and *OCT4*<sup>2bKOX4</sup> (n=6) stained negative. By day 8, NT Ctrl<sup>2b</sup> embryos had expanded  
150 and started hatching through the incision in the zona pellucida (ZP) made during the SCNT procedure,  
151 while *OCT4*<sup>2bKOX1</sup> and *OCT4*<sup>2bKOX4</sup> were not able to exit the ZP and expanded to a lesser extent compared  
152 to NT Ctrl<sup>2b</sup> embryos (supplementary Figure showing brightfield images will be added).

153 *Table 1: Developmental rates of somatic cell nuclear transfer (SCNT) embryos*

| Experimental group      | <i>OCT4</i> <sup>2bKOX1</sup> | <i>OCT4</i> <sup>2bKOX4</sup> | NT Ctrl <sup>2b</sup>    |
|-------------------------|-------------------------------|-------------------------------|--------------------------|
| No. of SCNT experiments | 7                             | 4                             | 9                        |
| No. of fused constructs | 276                           | 142                           | 166                      |
| Cleavage rate* (%)      | 79.9 ± 11                     | 83.5 ± 6.5                    | 70.3 ± 15.5              |
| Morula rate* (%)        | 42.7 ± 11.6                   | 58.2 ± 7.7                    | 47 ± 16.6                |
| Blastocyst rate* (%)    | 15.1 ± 6.9 <sup>a</sup>       | 38.2 ± 3.7 <sup>b</sup>       | 40.4 ± 13.5 <sup>b</sup> |

154 \* Data presented as mean ± standard deviation. Different superscript letters within a row indicate significant  
155 differences ( $P < 0.05$ , one-way ANOVA with Tukey multiple comparison test).

### 156 **SOX17 is lost in blastocysts lacking OCT4**

157 To elucidate the effects of loss of *OCT4* during the second lineage differentiation, we performed  
158 immunofluorescent staining of the lineage specific markers *GATA6*, *SOX17*, *NANOG* and *SOX2* [23, 24]  
159 at day 8 blastocyst stage. In IVP Ctrl and NT Ctrl<sup>2b</sup> embryos, we confirmed that at day 8 expression of  
160 *SOX2* is restricted to the ICM and that *NANOG* and *SOX17* are mutually exclusive markers of the EPI  
161 and HB, respectively. *GATA6* is expressed in both ICM and TE, and *GATA6* negative cells are present in  
162 the ICM. In contrast to the expression pattern in day 9 *ex vivo* embryos, *SOX17* and *GATA6* are always  
163 co-expressed with *SOX2*, indicating that *SOX2* is a late EPI marker (Figure 3, Supplementary Figures S2,  
164 S3). In *OCT4*<sup>2bKOX1</sup> day 8 SCNT blastocysts, there were no *GATA6* negative cells and *SOX2* was expressed  
165 exclusively in the ICM (Figure 3). As reported previously [9], there was no expression of *NANOG* and  
166 we did not detect any *SOX17* positive cells (supplementary Figures S2, S3).

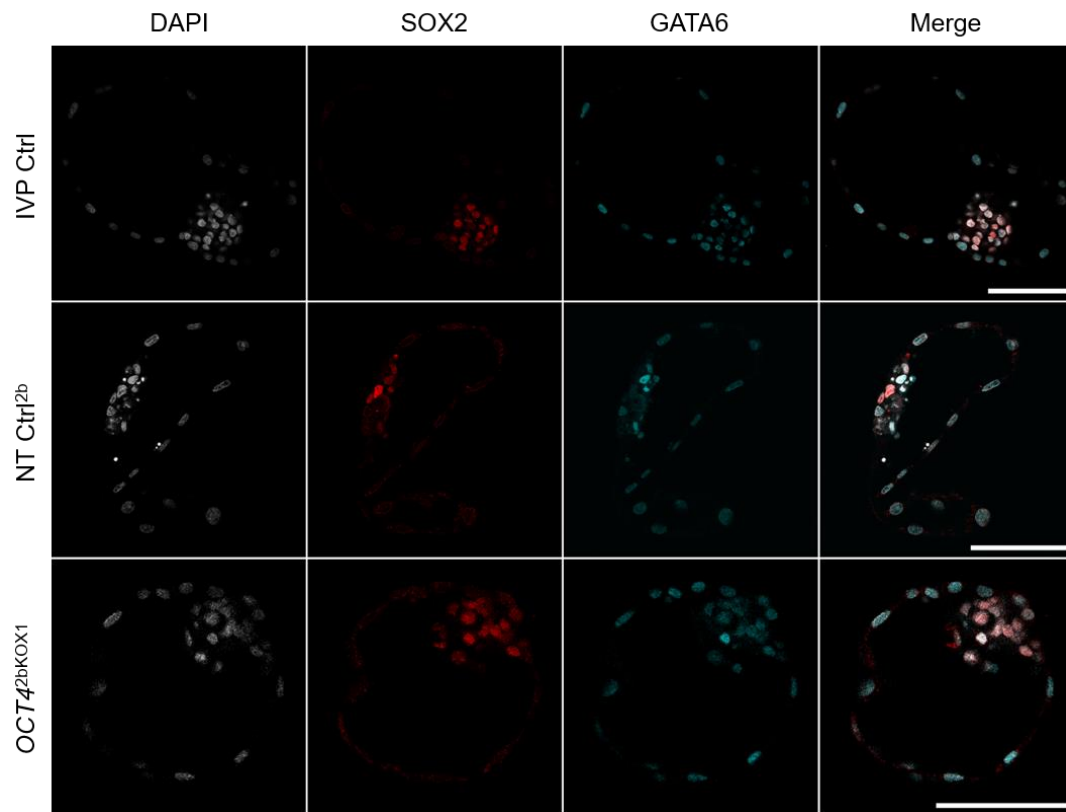

167

168 *Figure 3: Expression of SOX2 and GATA6 in day 8 blastocysts. Representative confocal planes of IVP Ctrl, NT Ctrl*  
169 *and OCT4<sup>2bKOX1</sup> embryos stained for SOX2/GATA6 (each n=4). All scale bars represent 100 μm.*

170 To validate our findings from SCNT experiments, we induced KO of *OCT4* directly in zygotes from IVF  
171 by injection of a ribonucleoprotein (RNP) consisting of Cas9 protein and synthesized sgRNA2b. As  
172 control, we used an RNP with no target in the bovine genome (sgRNA Ctrl). Developmental data from  
173 11 experiments with a total of 1224, 462 and 543 zygotes injected with *OCT4<sup>2bZi</sup>*, sgRNA Ctrl or non-  
174 injected, respectively, revealed that the injection procedure induced a decreased cleavage rate, but  
175 did not affect the percentage of blastocysts developed from cleaved zygotes (Table 2). To determine  
176 the mutation rate after injection, DNA was isolated from individual embryos and the targeted site was  
177 amplified for subsequent Sanger sequencing. From four experiments, we analyzed putative mutations  
178 in a total of 57 day 7 blastocysts, of which 34 had expanded. There were no significant differences in  
179 percentage of wildtype, biallelic, homozygous or monoallelic mutations between expanded and early  
180 day 7 blastocysts (Figure 4, C) and four expanded blastocysts carried homozygous mutations that  
181 induced a shift of the reading frame. Staining with antibodies against NANOG, SOX17 and OCT4 in  
182 *OCT4<sup>2bZi</sup>* day 8 blastocysts in combination with genotyping after the imaging procedure enabled us to  
183 confirm absence of OCT4 on the proteome level and frame shift mutation on the genomic level in  
184 addition to the expression patterns of NANOG and SOX17. Blastocysts injected with sgRNA Ctrl showed  
185 mutually exclusive expression of NANOG and SOX17 and co-expression of both markers with OCT4  
186 (n=8), while in *OCT4<sup>2bZi</sup>* blastocysts with successful deletion of OCT4, both proteins could not be  
187 detected (n=11, Figure 4, A and B).

188 *Table 2: Developmental rates of in vitro fertilized embryos after zygote injection (ZI)*

| Experimental group      | <i>OCT4</i> <sup>2bZl</sup> | sgRNA Ctrl                | non-injected             |
|-------------------------|-----------------------------|---------------------------|--------------------------|
| No. of ZI experiments   | 11                          |                           |                          |
| No. of injected zygotes | 1224                        | 462                       | 543                      |
| Cleavage rate* (%)      | 66.4 ± 10.5 <sup>a</sup>    | 68.3 ± 12.9 <sup>a</sup>  | 84 ± 5.4 <sup>b</sup>    |
| Morula rate* (%)        | 36.9 ± 10.3 <sup>a</sup>    | 42.9 ± 8.8 <sup>a</sup>   | 56.8 ± 11.1 <sup>b</sup> |
| Blastocyst rate* (%)    | 21.7 ± 9.9 <sup>a</sup>     | 27.1 ± 11.1 <sup>ab</sup> | 37.2 ± 5.9 <sup>b</sup>  |

189 \* Data presented as mean ± standard deviation. Different superscript letters within a row indicate significant  
 190 differences ( $P < 0.05$ , one-way ANOVA with Tukey multiple comparison test).

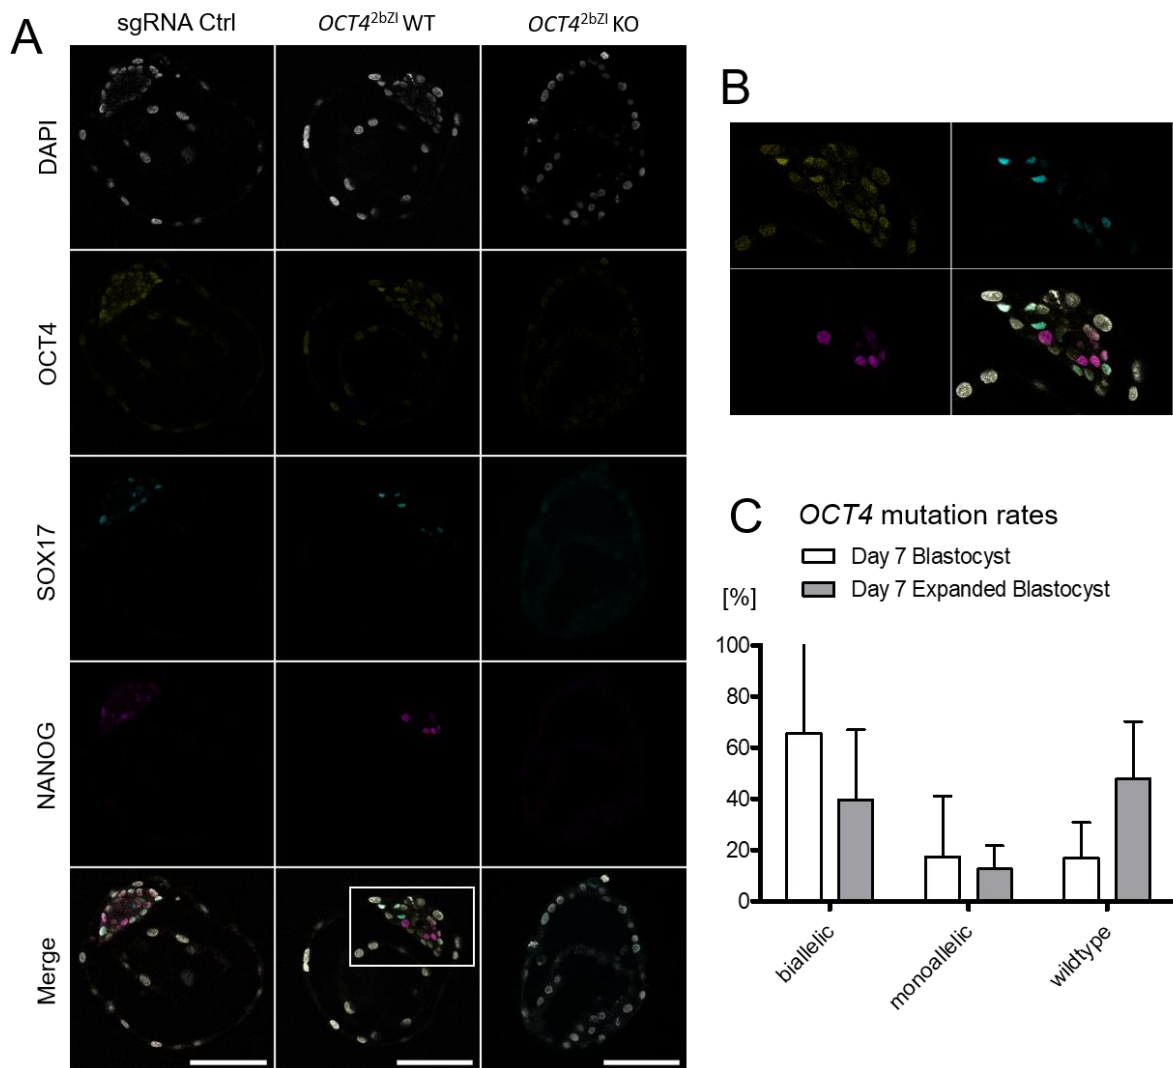

191  
 192 *Figure 4: The effect of loss of OCT4 in in vitro fertilized embryos. A) Representative confocal planes of day 8*  
 193 *blastocysts injected at zygote stage with a ribonucleoprotein without target (sgRNA Ctrl, n=8) or targeting OCT4*  
 194 *(sgRNA2b), where the wildtype genotype was maintained (OCT4<sup>2bZl</sup> WT, n=3) or knockout induced (OCT4<sup>2bZl</sup> KO,*  
 195 *n=11). Scale bars represent 100 μm. B) Enlarged region from panel A (OCT4<sup>2bZl</sup> WT merge). C) OCT4 mutation*  
 196 *rates in expanded and non-expanded day 7 blastocysts (P > 0.05, two tailed t-test).*

197 Developmental data from *OCT4* KO embryos produced by both SCNT and IVF show, that *OCT4* is not  
 198 essential for the formation of an expanded blastocyst by day 7. Expansion was present in SCNT



199 embryos – although less pronounced – as well as in IVF embryos that carried biallelic *OCT4* frameshift  
200 mutations. Yet, a decreased blastocyst rate in *OCT4*<sup>2bKOX1</sup> SCNT embryos and a higher percentage of  
201 expanded embryos where OCT4 remained intact demonstrate, that loss of OCT4 impedes the  
202 development to the expanded blastocyst stage.

### 203 Uterine environment cannot rescue the second lineage differentiation in *OCT4* KO embryos

204 To evaluate if the above-mentioned phenotype of *OCT4*<sup>2bKOX4</sup> embryos is alleviated or rescued when  
205 the second lineage differentiation occurs *in utero*, we transferred each four day 6 early blastocysts to  
206 five synchronized heifers and collected the embryos at day 9. As controls, we used each four IVP Ctrl  
207 blastocysts transferred to two recipients. We collected three day 9 *OCT4*<sup>2bKOX4</sup> expanded blastocysts  
208 from three different recipients and five IVP Ctrl expanded blastocysts. The transferred *OCT4*<sup>2bKOX4</sup> and  
209 IVP Ctrl embryos showed total cell numbers similar to *ex vivo* day 9 blastocysts (Figure 1, B) with  $139.3$   
210  $\pm 20.5$ ,  $155.6 \pm 50.28$  and  $161.5 \pm 39.1$  cells, respectively (mean  $\pm$  SD,  $P > 0.05$ ). Staining of NANOG and  
211 SOX17 revealed a similar expression pattern in IVF blastocysts compared to embryos completely  
212 developed *in vivo*. HB precursor cells began to form an inner lining within the blastocoel, which is  
213 confirmed by a similar proportion of SOX17 positive cells ( $15.1 \pm 5.8$  vs.  $18.9 \pm 4.8$ , mean [%]  $\pm$  SD,  $P >$   
214  $0.05$ ), while the proportion of NANOG positive cells was markedly reduced in the IVF embryos ( $6.9 \pm$   
215  $3.8$  vs.  $16.5 \pm 6.9$ , mean [%]  $\pm$  SD,  $P < 0.05$ ). All collected *OCT4*<sup>2bKOX4</sup> blastocysts stained negative for  
216 NANOG and SOX17. Although we were not able to recover the majority of *OCT4*<sup>2bKOX4</sup> blastocysts at day  
217 9 (3/20), our data shows that in the absence of OCT4, bovine embryos survive until day 9 and expand  
218 *in utero*, but the second lineage differentiation cannot be rescued by a uterine environment (Figure 5).

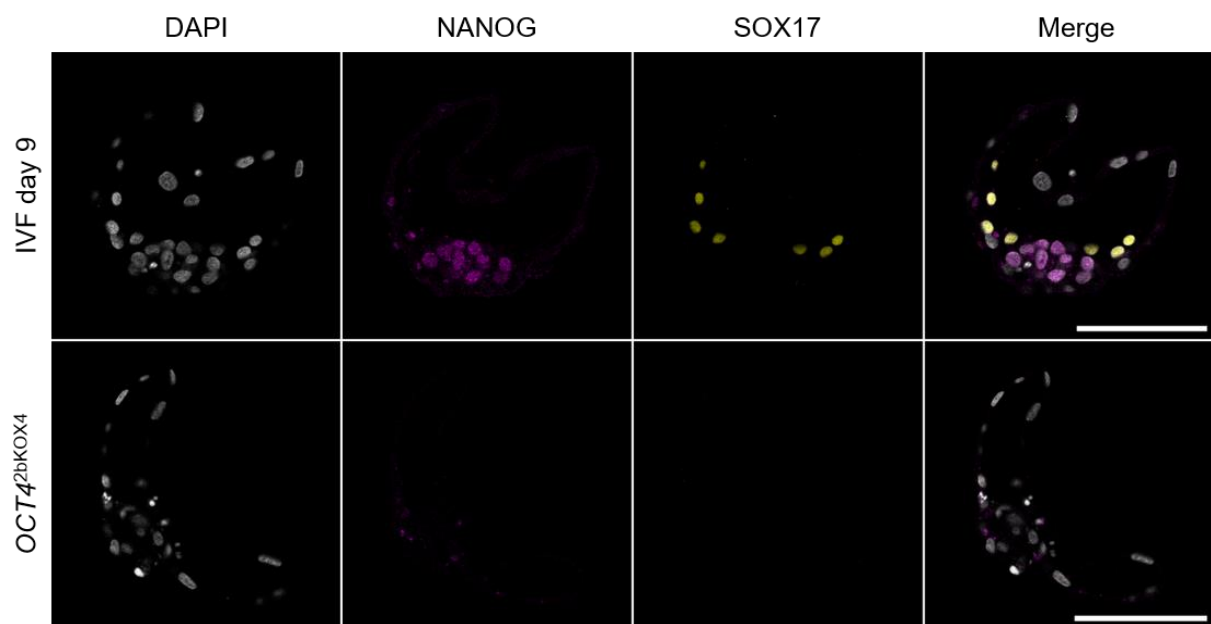

219

220 *Figure 5: Day 9 expanded blastocysts collected from recipient heifers stained against NANOG and SOX17.*  
221 *Representative confocal planes of day 9 blastocysts transferred to a recipient at day 6 and collected at day 9 from*  
222 *in vitro fertilization (IVF) or produced by SCNT using *OCT4*<sup>2bKOX4</sup> cells. Scale bars represent 100  $\mu$ m.*

### 223 *OCT4* is required cell-autonomously during the second lineage differentiation

224 We performed a chimera aggregation experiment in order to investigate, if *OCT4* is required cell-  
225 autonomously for the expression of NANOG and SOX17. Using fetal somatic cells (FSCs), we produced  
226 a single cell clone, in which an eGFP expression vector was randomly integrated and *OCT4* was knocked  
227 out by homozygous deletion of two nucleotides in frame (*OCT4*<sup>2bKOeGFP</sup>). Embryos from *OCT4*<sup>2bKOeGFP</sup>  
228 developed to expanded day 8 blastocysts, ubiquitously expressed eGFP and lacked expression of *OCT4*  
229 ( $n=7$ ), NANOG ( $n=8$ ) and SOX17 ( $n=7$ ). As aggregation partner, we used embryos generated from FSC

230 wildtype cells (NT Ctrl<sup>FSC</sup>), which at day 8 expressed SOX17 and NANOG as expected (n=3). In three  
231 experiments, we aggregated 25 chimeras and 12 showed contribution of both *OCT4*<sup>2bKOeGFP</sup> and NT  
232 Ctrl<sup>FSC</sup> cells to the blastocyst. In none of these chimeras we detected co-expression of eGFP with  
233 NANOG or SOX17 (Figure 6). Therefore, we conclude that OCT4 expression in neighboring cells within  
234 the ICM cannot rescue NANOG or SOX17 expression.

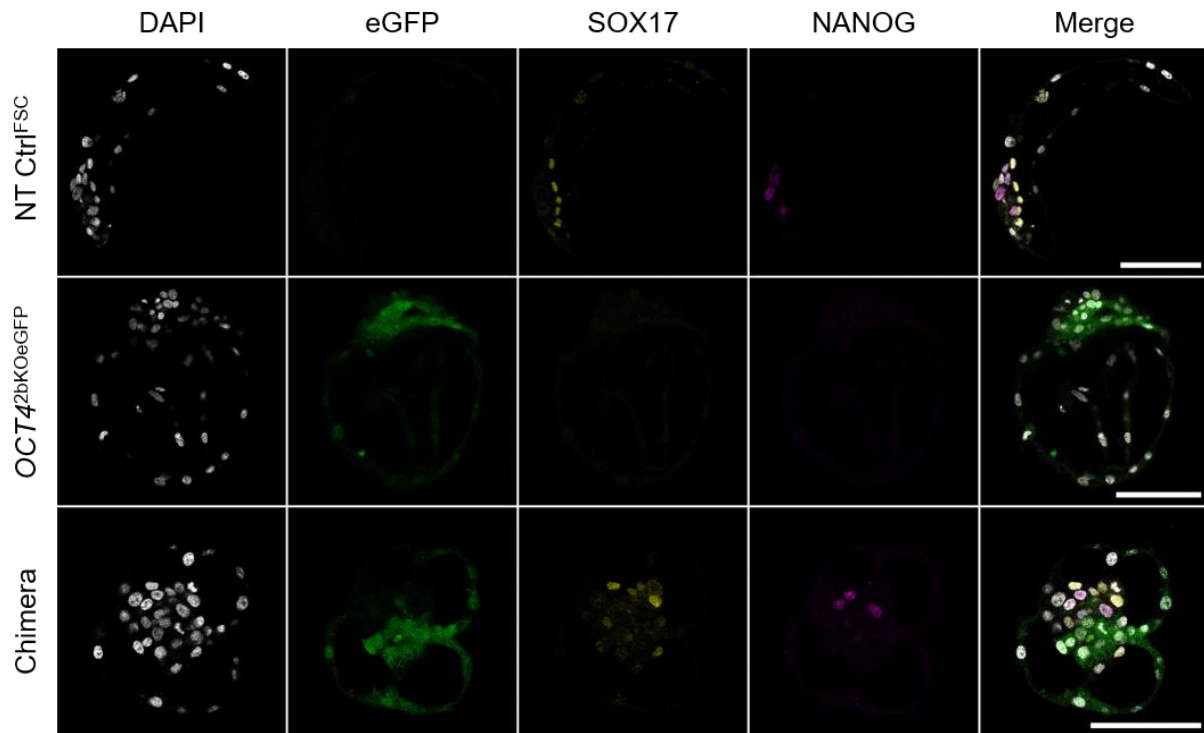

235

236 *Figure 6: Chimera from wildtype and OCT4 KO embryos. Representative confocal planes of day 8 blastocysts*  
237 *from SCNT using wildtype cells (NT Ctrl<sup>FSC</sup>) and cells tagged with eGFP carrying an OCT4 KO mutation*  
238 *(OCT4<sup>2bKOeGFP</sup>). Lower row in the panel shows chimera of the former embryos at day 8. Scale bars represent 100*  
239 *μm.*

240 To further elucidate the role of OCT4 in the differentiation of the HB, we incubated *OCT4*<sup>2bKOX4</sup> and NT  
241 Ctrl<sup>2b</sup> with exogenous FGF4, which induces pan-ICM expression of HB-markers and ablates the  
242 expression of NANOG in wildtype embryos [25]. NT Ctrl<sup>2b</sup> day 8 blastocysts showed full expression of  
243 SOX17 and no NANOG (n=10), while in *OCT4*<sup>2bKOX4</sup> 10 out of 16 blastocysts showed no expression of  
244 NANOG or SOX17 (Figure 7, A). In two blastocysts, we found ectopic SOX17 expression in the TE and  
245 four blastocysts had positive cells in the ICM, albeit at a significantly lower proportion to the total cell  
246 number as FGF4 treated NT Ctrl<sup>2b</sup> blastocysts ( $5 \pm 2.4$  vs.  $16.3 \pm 7.6$ , mean [%]  $\pm$  SD,  $P < 0.05$ ) and with  
247 a lower intensity of the fluorescent signal (supplementary Figure S4). Pairwise comparisons of the total  
248 cell number revealed a significant reduction due to loss of OCT4, which was alleviated by exogenous  
249 FGF4, while in NT Ctrl<sup>2b</sup> blastocysts, FGF4 had a detrimental effect on the total cell number (Figure 7,  
250 B). Because neither chimeric complementation nor treatment with exogenous FGF4 can restore a  
251 failing differentiation of the HB in cells without functional OCT4, we conclude that OCT4 is required  
252 cell-autonomously to induce HB formation.

253

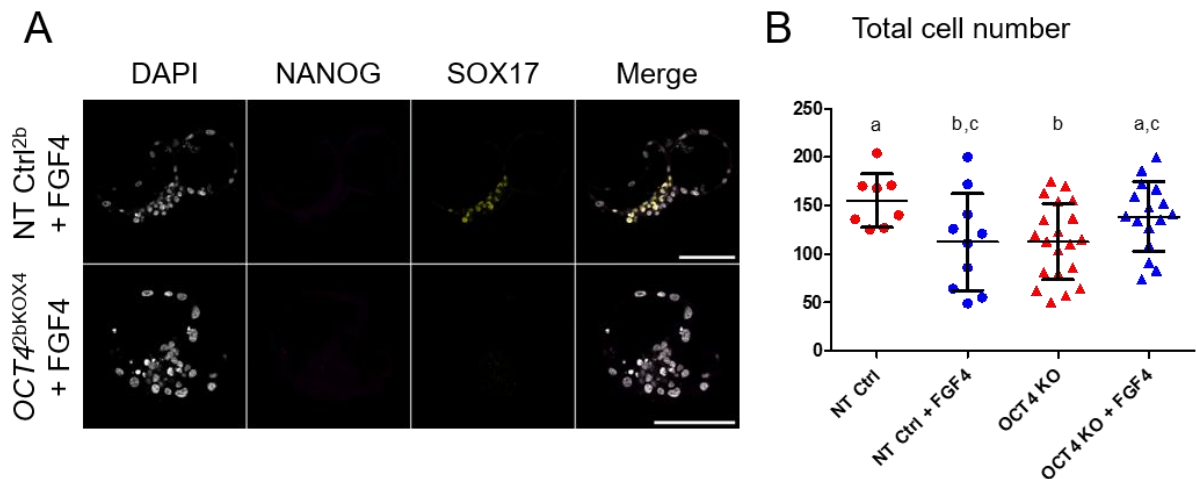

254

255 *Figure 7: The effect of exogenous FGF4 on OCT4 KO embryos. A) Representative confocal planes of NT Ctrl<sup>2b</sup> and*  
256 *OCT4<sup>2bKOX4</sup> day 8 blastocysts treated with FGF4 and heparin, stained for NANOG/SOX17 (each n = 10). All scale*  
257 *bars represent 100  $\mu$ m. B) Total cell numbers of NT Ctrl<sup>2b</sup> and OCT4<sup>2bKOX4</sup> with or without FGF4 treatment. Different*  
258 *superscript letters indicate significant differences (P < 0.05, two tailed t-test).*

## 259 DISCUSSION

260 In this study, we set out to further elucidate the role of OCT4 in bovine preimplantation development,  
261 especially during the second lineage differentiation. Because it has not been entirely clear how the  
262 expression of known markers of the different lineages evolves during establishment of the HB-lineage,  
263 we examined the patterns in *ex vivo* derived embryos at the blastocyst stage (day 7), the expanded  
264 blastocyst stage (day 9) and the ovoid blastocyst stage (day 12). Complete HB migration by day 11 has  
265 been documented before by staining of SOX17 [26]. We were able to show, that said migration begins  
266 at day 9 with an increase of SOX17 cells and their organization into the visceral HB, ending the salt and  
267 pepper distribution of HB- and EPI-precursor cells within the ICM. Interestingly, despite an increase in  
268 SOX17 cell numbers between day 7 and day 9, we did not detect differences in SOX17 transcript  
269 abundance. At day 7, we found a subset of embryos where SOX17 was not present yet, while in  
270 embryos that expressed the marker, intensity was low, mutually exclusive with NANOG and restricted  
271 to the ICM. Other studies using *in vitro* produced embryos report co-expression with NANOG as early  
272 as the 16-32 cell stage [10] and ectopic expression in the TE until day 6.5 [27]. In contrast to various  
273 reports using *in vitro* produced embryos [9, 10, 25], we did not find co-expression of GATA6 and  
274 NANOG in day 7 *ex vivo* embryos, indicating an earlier commitment to the HB or EPI lineage by  
275 reciprocal repression. The pluripotency factors OCT4 and SOX2 are restricted to the EPI by day 9, while  
276 at day 7 they are expressed throughout the blastocyst or the ICM, respectively, confirming SOX2 as a  
277 reliable marker for the ICM at day 7 [24]. The expression patterns described here may serve as a  
278 benchmark for assessing the quality of bovine embryos from long-term culture systems [26]. *In vitro*  
279 produced controls, that were transferred to recipients at day 6 and flushed at day 9, displayed the  
280 same total cell number and SOX17/NANOG expression pattern as completely *ex vivo* derived embryos,  
281 showing that short-term incubation *in vivo* is sufficient for stage-adequate development of the  
282 embryo, as reported previously [28].

283 Consistent with the staining pattern and in line with a previous report, we observed a steady reduction  
284 of OCT4 transcripts from day 7 to day 12, while the abundance of NANOG and SOX2 transcripts  
285 maintained the same levels between day 7 and day 9 and eventually decreased by day 12 [29]. Similar  
286 to human pregastrulation development, we found a decreasing abundance of transcripts associated  
287 with naïve pluripotency (*KLF4*, *KLF17*, *PRDM8*, *TFCP2L1*, *ZFP42*, *UTF1*) while markers for primed  
288 pluripotency, that increased in human (*FGF2*, *DNMT3B*, *SOX11*, *SFRP2*, *SALL2*), did not change from

289 day 7 until day 12 [17]. Van Leeuwen et al. [13] detected *NODAL* transcripts in the EPI of Rauber's layer  
290 (RL) stage (day 10-11) embryos and suggested *NODAL* activation through the convertase *FURIN*, which  
291 they detected in the RL. We found a massive increase (80-fold) in *NODAL* transcripts between day 7  
292 and 9 together with an increase of *FURIN* and *LEFTY2*, indicating that the *NODAL/BMP/WNT* pathway,  
293 that later regulates patterning [30], is already active by day 9.

294 Studies on the effects of *in vitro* culture on the transcriptome of bovine blastocysts have mainly  
295 identified pathways related to "energetic metabolism, extracellular matrix remodelling and  
296 inflammatory signaling" [31]. While we found a total of 463 DATs between *ex vivo* and *in vitro* produced  
297 day 7 embryos, only five DATs were lineage specific, indicating that the *in vitro* culture system has no  
298 substantial effect on the mechanisms of lineage differentiation. The fact that we only found two  
299 lineage specific DATs between NT Ctrl and *ex vivo* embryos strengthens the use of embryos from SCNT  
300 to study the basic mechanisms of early lineage differentiation.

301 By generating *OCT4* KO embryos with a sgRNA that exclusively targets *OCT4* using both SCNT and ZI,  
302 we aimed to dissolve existing conflicts regarding the *OCT4* KO phenotype in bovine embryos. We  
303 confirmed that, regardless of the applied method, *OCT4* is not essential for expansion of the blastocyst  
304 and showed that *OCT4* KO embryos survive until day 9 when transferred to a recipient cow. Daigneault  
305 et al. [19] reported, that targeting *OCT4* using ZI prevented development to the expanded blastocyst  
306 stage, while a previous report from our laboratory showed an unchanged morphology of *OCT4* KO  
307 blastocysts [9]. These two studies used the same sgRNA sequence, which also targets the pseudogene  
308 present in *ETF1*, therefore it is unlikely, that off-target effects caused the divergent phenotypes. Here  
309 we also applied ZI to delete *OCT4* and observed expansion of the blastocysts, therefore we can exclude  
310 effects of the different procedures used to knock out *OCT4*. We can only speculate that the conflicting  
311 results are caused by variables in the ZI procedure or the *in vitro* culture system.

312 As reported previously [9], loss of *NANOG* was observed in all embryos without functional *OCT4*, but  
313 the pluripotency marker *SOX2* was independent of *OCT4*, as reported previously [19] and similar to  
314 mouse [7]. Although there was no reduction in expression of the early HB marker *GATA6*, expression  
315 of *SOX17* failed in the absence of *OCT4*. As expression of *SOX17* is not dependent on *NANOG* [32], loss  
316 of *SOX17* can be linked directly to the *OCT4* KO phenotype. In the mouse, *Oct4* KO prevents the  
317 differentiation of the primitive endoderm, not only because *FGF4*-*MEK* signaling is reduced [33] but  
318 also because *OCT4* is required cell-autonomously [7, 8]. Using chimeric complementation and  
319 treatment of *OCT4* KO embryos with exogenous *FGF4*, we were able to show that similar to mouse,  
320 development of the HB requires *OCT4* not only for the production of paracrine factors, e.g., *FGF4*, but  
321 also for the induction of differentiation in HB precursor cells, i.e., *OCT4* is required cell-autonomously.  
322 Therefore, our data shows that, in the bovine preimplantation embryo *OCT4* is required during the  
323 second lineage differentiation for maintenance of pluripotency in the EPI and differentiation of the HB.

## 324 MATERIALS AND METHODS

### 325 *Ethics statement*

326 All animal procedures in this study were performed according to the German Animal Welfare Act and  
327 to a protocol approved by the Regierung von Oberbayern (reference number ROB-55.2-2532.Vet\_02-  
328 20-73).

### 329 *Statistics*

330 All data were analyzed with GraphPad Prism 5.04, mean values  $\pm$  standard deviation (SD) are  
331 presented. Statistical tests were two-tailed unpaired *t* test for pairwise comparisons or one-way  
332 ANOVA with Tukey multiple comparison test for analyses with more experimental groups. Level of  
333 significance was set to  $P < 0.05$ .

### 334 *Superstimulation of donors, transfer and flushing of ex vivo embryos*

335 German Simmental heifers, 18-20 months old and 350-420 kg, served as embryo donors and recipients.  
336 Superstimulation and artificial insemination (AI) was performed as described previously [34] and the  
337 embryos were collected non-surgically by flushing at day 7, 9 or 12 (day 0 = estrous) using a flushing  
338 catheter with an enlarged tip-opening. For transfer of day 6 *in vitro* produced embryos to the uterus,  
339 the estrous cycle of recipient heifers was synchronized with a progesterone-releasing intravaginal  
340 device for eight days (PRID-alpha, Ceva, Düsseldorf, Germany) and a single dose of PGF2 $\alpha$  analogue  
341 (500  $\mu$ g cloprostenol, Estrumate, Essex, Munich, Germany) at removal of the PRID. 48-72 h later, the  
342 recipients showed signs of estrous. At day 6, embryos were transferred using a standard procedure  
343 [35] and collected at day 9 as described above.

### 344 *RNA-Sequencing and Data Analysis*

345 Generation of RNA-sequencing libraries, sequencing, and data analysis was performed as described  
346 previously [9]. Briefly, after isolation of RNA, cDNA and RNA sequencing libraries were generated using  
347 the Ovation RNA-Seq System V2 Kit (Tecan Genomics, Redwood City, California) and tagmentation  
348 technology of the Nextera XT kit (Illumina, San Diego, California), respectively. Libraries were  
349 sequenced on a HiSeq1500 machine (Illumina) and reads were mapped to the bovine reference  
350 genome ARS-UCD1.2 [18] with STAR RNA sequence read mapper [36]. Differential gene expression  
351 analysis was performed with DeSeq2 [37], heat map was generated from a mean centered matrix using  
352 Heatmapper [38].

### 353 *In vitro fertilization and somatic cell nuclear transfer procedures*

354 *In vitro* fertilization and somatic cell nuclear transfer (SCNT) were performed as described previously  
355 [39]. Presumptive zygotes and activated fused complexes from SCNT were cultured in synthetic  
356 oviductal fluid supplemented with 5% estrous cow serum, 2X of basal medium eagle's amino acids  
357 solution 50X (Merck, Darmstadt, Germany) and 1X of minimal essential medium nonessential amino  
358 acid solution 100X (Merck). For culture of embryos with exogenous FGF4, human recombinant FGF4  
359 (R&D Systems, Minneapolis, Minnesota) and heparin (Merck) were added at each 1  $\mu$ g/ml [25].

### 360 *Immunofluorescence microscopy and image analysis*

361 Before fixation, the *zona pellucida* was removed enzymatically using pronase (Merck) [40] or  
362 mechanically for *in vitro* produced or *ex vivo* flushed embryos, respectively. Embryos from *in vitro*  
363 culture were fixed in a solution containing 2% paraformaldehyde (PFA, Merck) for 20 min at 37° C [41]  
364 and *ex vivo* flushed embryos were fixed in 4% PFA over night at 4° C. After sequential blocking for each  
365 1 h in 5% donkey and fetal calf serum (Jackson ImmunoResearch, Ely, United Kingdom) and 0.5% Triton

366 X-100 (Merck), embryos were transferred to the first antibody solution and incubated over night at 4°  
367 C. After washing, embryos were incubated in the second antibody solution for 1 h at 37° C and  
368 subsequently mounted in Vectashield mounting medium containing 4',6-diamidin-2-phenylindol  
369 (DAPI, Vector Laboratories, Burlingame, California) in a manner that conserves the 3D structure of the  
370 specimen [42]. The antibodies used and their dilutions are provided in supplementary Table S1. Stacks  
371 of optical sections were recorded with a Leica SP8 confocal microscope (Leica, Wetzlar, Germany) at  
372 an interval of 1 µm using water immersion HC PL APO CS2 40X 1.1 NA or HC PL APO CS2 20X 0.75 NA  
373 objectives (Leica) and a pinhole of 0.9 airy units. DAPI, eGFP, Alexa Fluor 555, Rhodamine Red™-X and  
374 Alexa Fluor 647 were excited with laser lines of 405 nm, 488 nm, and 499 nm, 573 nm and 653 nm,  
375 respectively, and detection ranges were set to 422 to 489 nm, 493 to 616 nm, 561 to 594 nm, 578 to  
376 648 nm and 660 to 789 nm, respectively. Cell numbers were counted manually using the manual  
377 counting plug in of Icy bio-imaging software [43], figures were produced using FigureJ software [44].

### 378 *Induction of OCT4 knockout in fibroblast cells and zygotes*

379 For transfection of adult ear fibroblasts, the sgRNA2b (5' ACTCACCAAAGAGAACCCCC 3') was cloned  
380 into pSpCas9(BB)-2A-Puro (PX459) V2.0, a gift from Feng Zhang (Addgene plasmid # 62988), using the  
381 *BbsI* cutting site [45]. Transfection and clonal expansion after selection with 2 µg/mL puromycin for 48  
382 h was performed as described previously [46]. Generation of *OCT4* KO cells randomly tagged by eGFP  
383 was achieved by first transfecting somatic cells derived from a fetus with a crown-rump length of 9 cm  
384 (FSC) with a linearized DNA construct and subsequently inducing *OCT4* KO via lipofection using a  
385 ribonucleotide complex (RNP) containing the sgRNA2b. The linearized construct was produced by  
386 excising the CAG-eGFP-SV40pA sequence from a plasmid, generated by introducing a de novo  
387 synthesized CAG promoter and eGFP-SV40pA [47] into the pUC57-AmpR vector backbone. The RNP  
388 was produced by mixing the synthetic and modified sgRNA2b (Synthego, Redwood City, California) and  
389 TrueCut™ Cas9 Protein v2 (Thermo Fisher Scientific, Waltham, Massachusetts) at equimolar  
390 concentrations of 8 µM in 10 mM TRIS-buffer with 1 mM EDTA. Lipofection was performed in a 6-well  
391 dish using CRISPRMAX™ Cas9 Transfection Reagent (Thermo Fisher Scientific) according to the  
392 manufacturer's instructions. After 48 h of lipofection, eGFP positive cells were sorted individually into  
393 96-well dishes and clonal expansion as described above was performed. Screening of single cell clones  
394 for mutations at *OCT4* and *ETF1* was achieved by Sanger sequencing as described previously [9] with  
395 primers presented in supplementary Table S2. For zygote injection, RNPs with final concentrations of  
396 2 µM sgRNA2b or sgRNA Ctrl (5' GGTCTTCGAGAAGACCTGCG 3') and 1 µM Cas9 in 10 mM TRIS-buffer  
397 with 0.1 mM EDTA were produced as described above. After co-incubation of sperm and cumulus-  
398 oocyte-complexes for 14 h, cumulus cells were removed by vortexing and approximately 10 µL of the  
399 RNP were injected into presumptive zygotes using a FemtoJet4i device (Eppendorf, Hamburg,  
400 Germany). After 7 days of culture, DNA was extracted by incubating the blastocysts in a buffer  
401 containing 25 mM MgCl<sub>2</sub>, 1 µL/mL TritonX-100 and 150 µg/mL Proteinase K (Carl Roth, Karlsruhe,  
402 Germany) at 37° C for 1 h and subsequently at 99° C for 8 min. For Sanger sequencing, a nested PCR  
403 amplification of the *OCT4* locus was performed using 2 µL of the DNA extraction buffer directly as  
404 template. For the first PCR, we ran 25 cycles with Herculase II Fusion DNA Polymerase (Agilent, Santa  
405 Clara, California) in a 25 µL reaction volume; the second PCR used 2 µL of the first reaction as template  
406 and HotStarTaq DNA Polymerase (Qiagen, Hilden, Germany) in a 20 µL reaction volume for 15 cycles.  
407 All PCRs were performed using the buffers and instructions provided by the manufacturers, primer  
408 sequences are provided in supplementary Table S2. Extraction of DNA from fixed embryos after the  
409 imaging procedure was achieved by using the QIAamp DNA Micro Kit (Qiagen) according to the  
410 manufacturer's instructions regarding the isolation of genomic DNA from laser-microdissected tissues  
411 followed by 35 cycles of Herculase II PCR using 4 µL of template.

## 413 *Chimera aggregation*

414 Embryos were produced via SCNT from *OCT4* KO cells tagged with eGFP (*OCT4*<sup>2bKOeGFP</sup>) and FSC wildtype  
415 cells (NT Ctrl<sup>FSC</sup>). At day 4, the ZP was removed enzymatically and each one morula from *OCT4*<sup>2bKOeGFP</sup>  
416 and NT Ctrl<sup>FSC</sup> were aggregated to a chimera using phytohemagglutinin (Merck) and cultured as  
417 described previously [40]. Chimera formation was confirmed by time-lapse imaging (Primo Vision,  
418 Vitrolife, Göteborg, Sweden) and by detection of both eGFP positive and negative cells in the  
419 developed blastocysts. Chimeric blastocysts were fixed and stained as described above.

## 420 **SUPPLEMENTARY INFORMATION**

421 Dataset S1: Lineage specific genesets and DeSEQ2 analyses

422 Table S1: Primary and secondary antibodies used for immunofluorescence

423 Table S2: Primers used for genotyping

424 Figure S1: The effect of in vitro culture, SCNT and *OCT4* KO on the transcriptome of day 7 blastocysts

425 Figure S2: Expression of NANOG and SOX17 in day 8 blastocysts

426 Figure S3: Expression of SOX2 and SOX17 in day 8 blastocysts

427 Figure S4: Expression of SOX17 in FGF4 treated *OCT4*<sup>2bKO</sup> day 8 blastocysts

## 428 **ACKNOWLEDGEMENTS**

429 This work was supported by funds from the Deutsche Forschungsgemeinschaft (DFG) under grants  
430 405453332 and TRR127 and the Bayerische Forschungstiftung under grant AZ-1300-17.

## 431 **COMPETING INTERESTS**

432 The authors declare no competing interests.

## 433 **REFERENCES**

- 434 1. Artus, J. and C. Chazaud, *A close look at the mammalian blastocyst: epiblast and primitive*  
435 *endoderm formation*. Cellular and Molecular Life Sciences, 2014. **71**(17): p. 3327-3338.
- 436 2. Chazaud, C. and Y. Yamanaka, *Lineage specification in the mouse preimplantation embryo*.  
437 *Development*, 2016. **143**(7): p. 1063-1074.
- 438 3. Simmet, K., V. Zakhartchenko, and E. Wolf, *Comparative aspects of early lineage specification*  
439 *events in mammalian embryos—insights from reverse genetics studies*. Cell Cycle, 2018: p. 1-8.
- 440 4. Springer, C., E. Wolf, and K. Simmet, *A New Toolbox in Experimental Embryology—Alternative*  
441 *Model Organisms for Studying Preimplantation Development*. Journal of Developmental  
442 *Biology*, 2021. **9**(2): p. 15.
- 443 5. Gerri, C., et al., *Human Embryogenesis: A Comparative Perspective*. Annual Review of Cell and  
444 *Developmental Biology*, 2020. **36**: p. 411-440.
- 445 6. Frum, T. and A. Ralston, *Cell signaling and transcription factors regulating cell fate during*  
446 *formation of the mouse blastocyst*. Trends in Genetics, 2015. **31**(7): p. 402-410.
- 447 7. Frum, T., et al., *Oct4 cell-autonomously promotes primitive endoderm development in the*  
448 *mouse blastocyst*. Developmental cell, 2013. **25**(6): p. 610-622.
- 449 8. Le Bin, G.C., et al., *Oct4 is required for lineage priming in the developing inner cell mass of the*  
450 *mouse blastocyst*. Development, 2014. **141**(5): p. 1001-1010.
- 451 9. Simmet, K., et al., *OCT4/POU5F1 is required for NANOG expression in bovine blastocysts*.  
452 *Proceedings of the National Academy of Sciences*, 2018. **115**(11): p. 2770-2775.
- 453 10. Canizo, J.R., et al., *A dose-dependent response to MEK inhibition determines hypoblast fate in*  
454 *bovine embryos*. BMC developmental biology, 2019. **19**(1): p. 13.

- 455 11. Bernardo, A.S., et al., *Mammalian embryo comparison identifies novel pluripotency genes*  
456 *associated with the naïve or primed state*. 2018. **7**(8): p. bio033282.
- 457 12. Charpigny, G., et al., *PGE2 Supplementation of Oocyte Culture Media Improves the*  
458 *Developmental and Cryotolerance Performance of Bovine Blastocysts Derived From a Serum-*  
459 *Free in vitro Production System, Mirroring the Inner Cell Mass Transcriptome*. *Frontiers in Cell*  
460 *and Developmental Biology*, 2021. **9**(1371).
- 461 13. van Leeuwen, J., D.K. Berg, and P.L. Pfeffer, *Morphological and Gene Expression Changes in*  
462 *Cattle Embryos from Hatched Blastocyst to Early Gastrulation Stages after Transfer of In Vitro*  
463 *Produced Embryos*. *PloS one*, 2015. **10**(6): p. e0129787.
- 464 14. Pfeffer, P.L., et al., *Gene expression analysis of bovine embryonic disc, trophoblast and*  
465 *parietal hypoblast at the start of gastrulation*. *Zygote*, 2017. **25**(3): p. 265-278.
- 466 15. Papanayotou, C. and J. Collignon, *Activin/Nodal signalling before implantation: setting the*  
467 *stage for embryo patterning*. *Philosophical Transactions of the Royal Society B: Biological*  
468 *Sciences*, 2014. **369**(1657): p. 20130539.
- 469 16. Hill, C.S., *Spatial and temporal control of NODAL signaling*. *Current Opinion in Cell Biology*,  
470 2018. **51**: p. 50-57.
- 471 17. Molè, M.A., et al., *A single cell characterisation of human embryogenesis identifies*  
472 *pluripotency transitions and putative anterior hypoblast centre*. *Nature Communications*,  
473 2021. **12**(1): p. 3679.
- 474 18. Rosen, B.D., et al., *De novo assembly of the cattle reference genome with single-molecule*  
475 *sequencing*. *GigaScience*, 2020. **9**(3).
- 476 19. Daigneault, B.W., et al., *Embryonic POU5F1 is Required for Expanded Bovine Blastocyst*  
477 *Formation*. *Scientific Reports*, 2018. **8**(1): p. 7753.
- 478 20. Schiffmacher, A.T. and C.L. Keefer, *CDX2 regulates multiple trophoblast genes in bovine*  
479 *trophoblast CT-1 cells*. *Molecular reproduction and development*, 2013. **80**(10): p. 826-  
480 839.
- 481 21. Fogarty, N.M., et al., *Genome editing reveals a role for OCT4 in human embryogenesis*.  
482 *Nature*, 2017. **550**(7674): p. 67.
- 483 22. Ran, F.A., et al., *Genome engineering using the CRISPR-Cas9 system*. *Nat Protoc*, 2013. **8**(11):  
484 p. 2281-2308.
- 485 23. Khan, D.R., et al., *Expression of pluripotency master regulators during two key developmental*  
486 *transitions: EGA and early lineage specification in the bovine embryo*. *PloS one*, 2012. **7**(3): p.  
487 e34110.
- 488 24. Goissis, M.D. and J.B. Cibelli, *Functional characterization of SOX2 in bovine preimplantation*  
489 *embryos*. *Biology of Reproduction*, 2014. **90**(2): p. 30, 1-10.
- 490 25. Kuijk, E.W., et al., *The roles of FGF and MAP kinase signaling in the segregation of the*  
491 *epiblast and hypoblast cell lineages in bovine and human embryos*. *Development*, 2012.  
492 **139**(5): p. 871-882.
- 493 26. Ramos-Ibeas, P., et al., *Embryonic disc formation following post-hatching bovine embryo*  
494 *development in vitro*. *Reproduction*, 2020. **160**(4): p. 579-589.
- 495 27. Kohri, N., et al., *Trophoblast regeneration to support full-term development in the inner*  
496 *cell mass isolated from bovine blastocyst*. *Journal of Biological Chemistry*, 2019. **294**(50): p.  
497 19209-19223.
- 498 28. Machado, G.M., et al., *Post-hatching development of in vitro bovine embryos from day 7 to*  
499 *14 in vivo versus in vitro*. *Molecular Reproduction and Development*, 2013. **80**(11): p. 936-  
500 947.
- 501 29. Velásquez, A., et al., *The expression level of SOX2 at the blastocyst stage regulates the*  
502 *developmental capacity of bovine embryos up to day-13 of in vitro culture*. *Zygote*, 2019.  
503 **27**(6): p. 398-404.
- 504 30. van Leeuwen, J., et al., *On the enigmatic disappearance of Rauber's layer*. *Proceedings of the*  
505 *National Academy of Sciences*, 2020. **117**(28): p. 16409-16417.
- 506 31. Cagnone, G. and M.-A. Sirard, *The embryonic stress response to in vitro culture: insight from*  
507 *genomic analysis*. *Reproduction*, 2016. **152**(6): p. R247-R261.



- 508 32. Springer, C., et al., *Hypoblast Formation in Bovine Embryos Does Not Depend on NANOG*.  
509 Cells, 2021. **10**(9): p. 2232.
- 510 33. Nichols, J., et al., *Formation of pluripotent stem cells in the mammalian embryo depends on*  
511 *the POU transcription factor Oct4*. Cell, 1998. **95**(3): p. 379-391.
- 512 34. Reichenbach, M., et al., *Germ-line transmission of lentiviral PGK-EGFP integrants in*  
513 *transgenic cattle: new perspectives for experimental embryology*. Transgenic research, 2010.  
514 **19**(4): p. 549-556.
- 515 35. Klein, C., et al., *Monozygotic twin model reveals novel embryo-induced transcriptome*  
516 *changes of bovine endometrium in the preattachment period*. Biology of reproduction, 2006.  
517 **74**(2): p. 253-264.
- 518 36. Dobin, A. and T.R. Gingeras, *Mapping RNA-seq Reads with STAR*. Curr Protoc Bioinformatics,  
519 2015. **51**: p. 11.14.1-11.14.19.
- 520 37. Love, M.I., W. Huber, and S. Anders, *Moderated estimation of fold change and dispersion for*  
521 *RNA-seq data with DESeq2*. Genome Biology, 2014. **15**(12): p. 550.
- 522 38. Babicki, S., et al., *Heatmapper: web-enabled heat mapping for all*. Nucleic Acids Res, 2016.  
523 **44**(W1): p. W147-53.
- 524 39. Bauersachs, S., et al., *The endometrium responds differently to cloned versus fertilized*  
525 *embryos*. Proceedings of the National Academy of Sciences, 2009. **106**(14): p. 5681-5686.
- 526 40. Simmet, K., et al., *Phytohemagglutinin facilitates the aggregation of blastomere pairs from*  
527 *Day 5 donor embryos with Day 4 host embryos for chimeric bovine embryo multiplication*.  
528 Theriogenology, 2015. **84**(9): p. 1603-1610.
- 529 41. Messinger, S.M. and D.F. Albertini, *Centrosome and microtubule dynamics during meiotic*  
530 *progression in the mouse oocyte*. Journal of Cell Science, 1991. **100**(2): p. 289-298.
- 531 42. Wuensch, A., et al., *Quantitative monitoring of pluripotency gene activation after somatic*  
532 *cloning in cattle*. Biology of reproduction, 2007. **76**(6): p. 983-991.
- 533 43. De Chaumont, F., et al., *Icy: an open bioimage informatics platform for extended reproducible*  
534 *research*. Nature methods, 2012. **9**(7): p. 690-696.
- 535 44. Muttterer, J. and E. Zinck, *Quick-and-clean article figures with FigureJ*. Journal of Microscopy,  
536 2013. **252**(1): p. 89-91.
- 537 45. Ran, F.A., et al., *Genome engineering using the CRISPR-Cas9 system*. Nature protocols, 2013.  
538 **8**(11): p. 2281-2308.
- 539 46. Vochozkova, P., et al., *Gene Editing in Primary Cells of Cattle and Pig*. Methods Mol Biol,  
540 2019. **1961**: p. 271-289.
- 541 47. Hedegaard, C., et al., *Porcine synapsin 1: SYN1 gene analysis and functional characterization*  
542 *of the promoter*. FEBS Open Bio, 2013. **3**: p. 411-420.
